# Supplementary material
Source: PubMed Central journal article supplement (PMC3848201)

Supplemental Figure 1

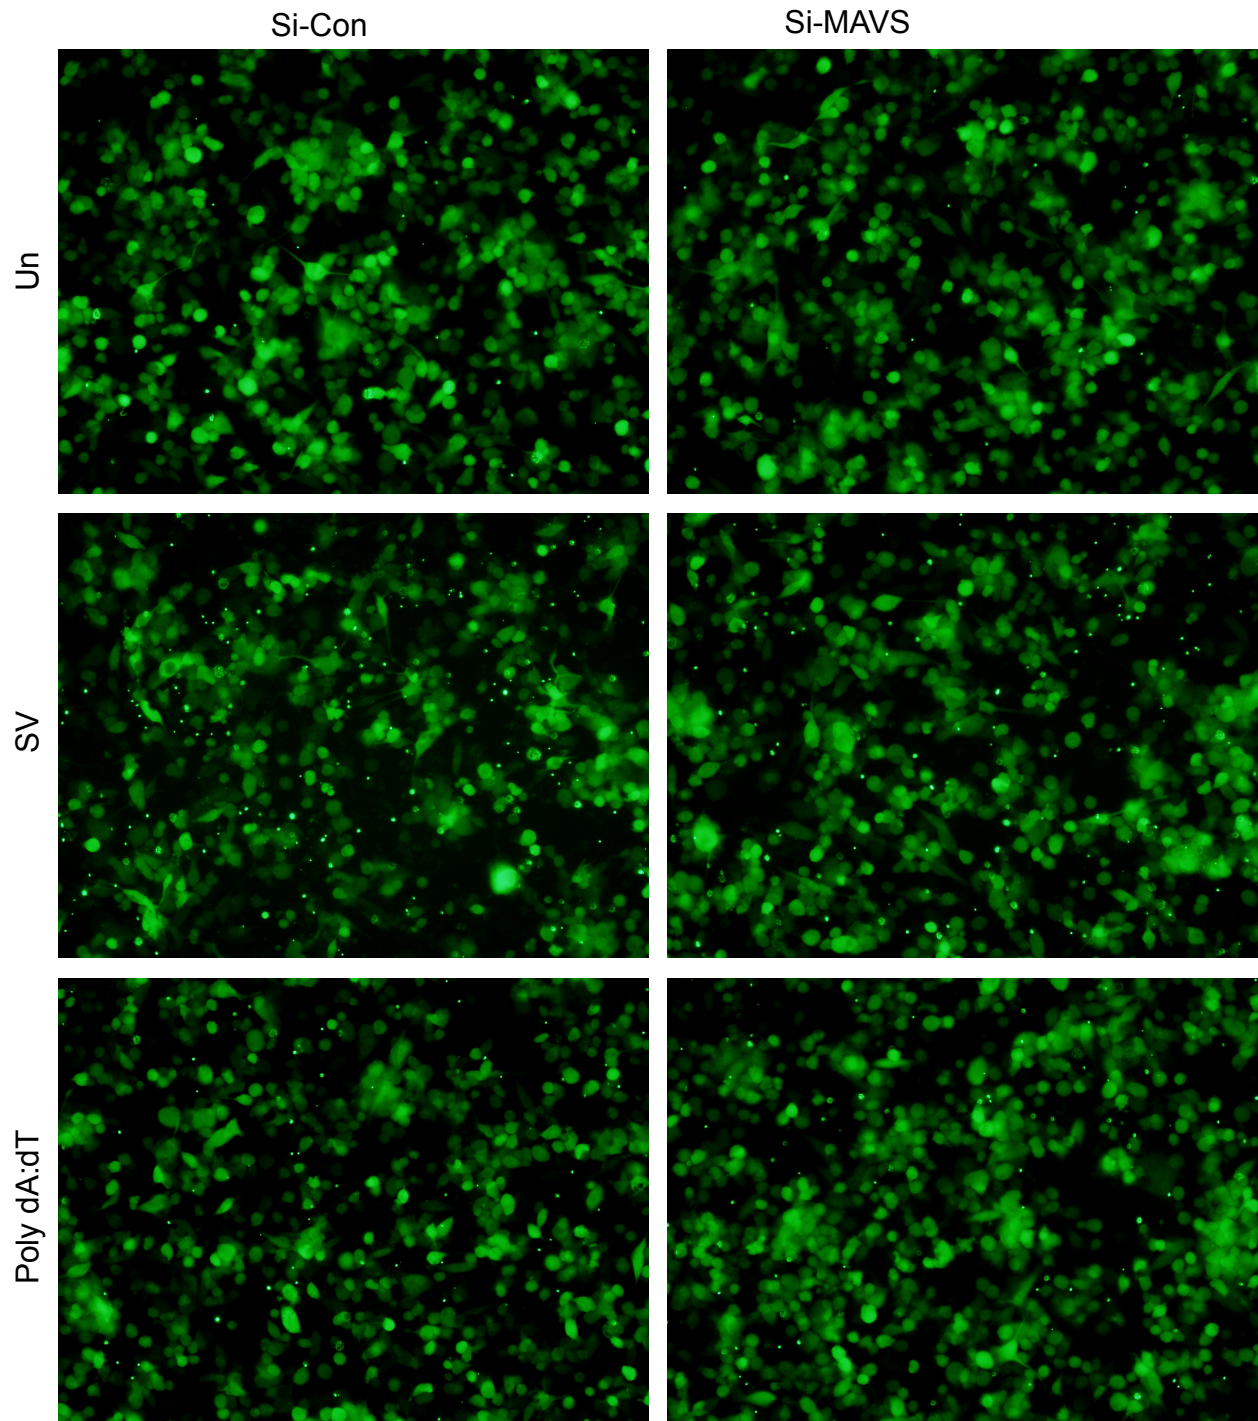

Supplement: NIHMS516807-supplement-2.pdf [file NIHMS516807-supplement-2.pdf]

## Supplemental Figure 2

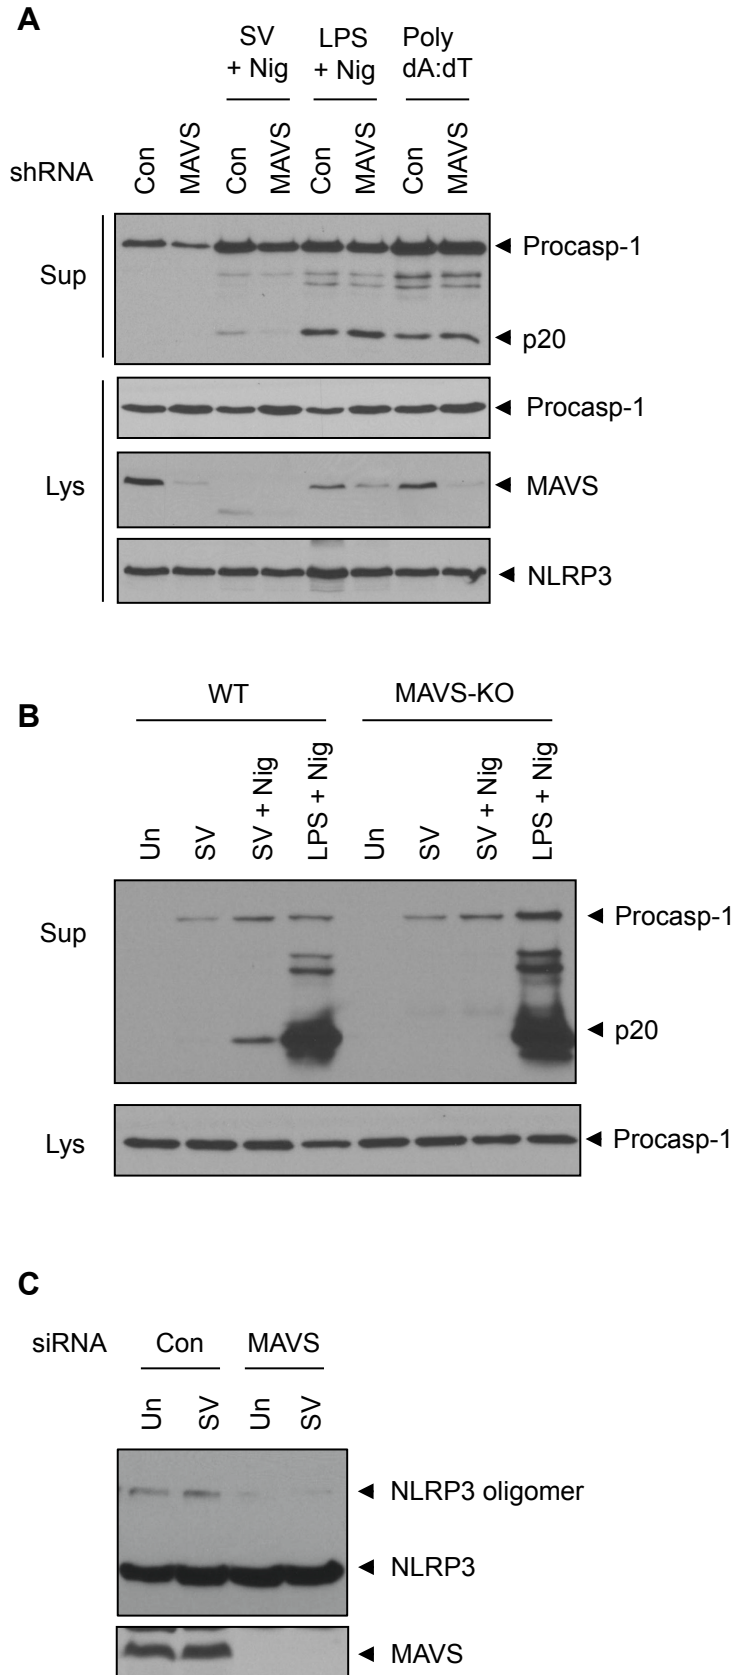

Supplement: NIHMS516807-supplement-3.pdf [file NIHMS516807-supplement-3.pdf]
